# Supplementary material for: The Current Status, Energy Implications, and Governance of Urban Wastewater Treatment and Reuse: A System Analysis of the Beijing Case
Source: MDPI journal article supplement (doi:10.3390/w15040630), 2023-02-06
Supplement: s1 [file s1]

Archive with 1 entries (1 files):
- water-2171342-SI.pdf
