# Supplementary material for: The Current Status, Energy Implications, and Governance of Urban Wastewater Treatment and Reuse: A System Analysis of the Beijing Case
Source: MDPI journal article supplement (doi:10.3390/w15040630), 2023-02-06
Supplement: s1 [file s1 › water-2171342-SI.pdf]

**Table S1: The characteristics of 175 WWTPs in Beijing**

| No. | District  | Name                                                               | Treatment capacity in 2019<br>(10000 tons/day) | Treatment technologies (MBR or non-MBR) | Government -owned plant | Electricity consumption in 2017 (kWh) |
|-----|-----------|--------------------------------------------------------------------|------------------------------------------------|-----------------------------------------|-------------------------|---------------------------------------|
| 1   | Changping | Shahe Reclaimed Water plant II                                     | 6                                              | Non-MBR                                 | Y                       | -                                     |
| 2   | Changping | Beijing Water Group Changxiang Wastewater treatment Company (Ltd.) | 3                                              | Non-MBR                                 | Y                       | -                                     |
| 3   | Changping | Shahe Reclaimed Water Plant I                                      | 3                                              | MBR                                     | Y                       | 2575927                               |
| 4   | Daxing    | Dalonghe Wastewater treatment plant                                | 0.15                                           | Non-MBR                                 | Y                       | -                                     |
| 5   | Daxing    | Beizangcun town Liuhezhuang & Macun Wastewater treatment plant     | 0.07                                           | MBR                                     | Y                       | -                                     |
| 6   | Daxing    | Jiangfeng wastewater treatment plant                               | 0.05                                           | MBR                                     | Y                       | -                                     |
| 7   | Daxing    | Nanyuan Guanqu wastewater treatment plant                          | 0.36                                           | MBR                                     | Y                       | -                                     |
| 8   | Daxing    | New Xifeng wastewater treatment plant                              | 0.28                                           | MBR                                     | Y                       | -                                     |
| 9   | Daxing    | Yinghai wastewater treatment plant                                 | 3                                              | MBR                                     | Y                       | -                                     |
| 10  | Huairou   | Yanxi wastewater treatment plant                                   | 0.6                                            | Non-MBR                                 | Y                       | -                                     |
| 11  | Huairou   | Huairou wastewater treatment plant                                 | 13                                             | Non-MBR                                 | Y                       | -                                     |

|    |          |                                               |      |         |   |          |
|----|----------|-----------------------------------------------|------|---------|---|----------|
| 12 | Tongzhou | Ciqu wastewater treatment plant               | 1    | Non-MBR | Y | -        |
| 13 | Fangshan | Fangshan Chengguan wastewater treatment plant | 2    | Non-MBR | Y | 1948138  |
| 14 | Fangshan | Fangshan Chengguan reclaimed water plant      | 2    | MBR     | Y | -        |
| 15 | Fangshan | Hebei town wastewater treatment plant         | 0.5  | MBR     | Y | -        |
| 16 | Yanqing  | Kangzhuang town wastewater treatment plant    | 0.89 | Non-MBR | Y | -        |
| 17 | Fangshan | Qinglonghu town wastewater treatment plant    | 0.35 | MBR     | Y | -        |
| 18 | Fangshan | Zhoukou town wastewater treatment plant       | 0.5  | Non-MBR | Y | -        |
| 19 | Chaoyang | Beixiaohe wastewater treatment plant          | 10   | MBR     | Y | 24986856 |
| 20 | Chaoyang | Jiuxianqiao reclaimed water plant             | 20   | Non-MBR | Y | -        |
| 21 | Fengtai  | Lugouqiao reclaimed water plant               | 10   | Non-MBR | Y | 9010770  |
| 22 | Haidian  | Qinghe reclaimed water plant                  | 55   | Non-MBR | Y | -        |
| 23 | Fengtai  | Wujiacun reclaimed water plant                | 8    | Non-MBR | Y | -        |
| 24 | Chaoyang | Xiaohongmen reclaimed water plant             | 60   | Non-MBR | Y | 97495503 |

|    |           |                                                            |      |         |   |         |
|----|-----------|------------------------------------------------------------|------|---------|---|---------|
| 25 | Haidian   | Cuihu reclaimed water plant                                | 2    | Non-MBR | Y | 3195074 |
| 26 | Haidian   | Shangzhuang reclaimed water plant                          | 1.2  | Non-MBR | Y | -       |
| 27 | Haidian   | Wenquan reclaimed water plant                              | 2    | Non-MBR | Y | 3624065 |
| 28 | Haidian   | Yongfeng reclaimed water plant                             | 2    | Non-MBR | Y | 4623416 |
| 29 | Fangshan  | Hancunhe emergency wastewater treatment plant              | 0.6  | MBR     | Y | -       |
| 30 | Fangshan  | Nanhanji wastewater treatment plant                        | 0.07 | MBR     | Y | -       |
| 31 | Fangshan  | Tianjiayuan wastewater treatment plan                      | 1.34 | MBR     | Y | -       |
| 32 | Fangshan  | Xinjie wastewater treatment plan                           | 0.12 | MBR     | Y | -       |
| 33 | Fangshan  | Yanduliming wastewater treatment plan                      | 0.2  | MBR     | Y | -       |
| 34 | Daxing    | Daxing district east wastewater treatment plant (III & VI) | 5    | MBR     | Y | -       |
| 35 | Mentougou | Mentougou district reclaimed water plant II                | 8    | MBR     | Y | 2906300 |
| 36 | Yanqing   | Zhangshanying town reclaimed water plant                   | 0.26 | MBR     | Y | -       |
| 37 | Chaoyang  | Dingfuzhuang reclaimed water plant                         | 30   | Non-MBR | Y | -       |

|    |          |                                                                |     |         |   |           |
|----|----------|----------------------------------------------------------------|-----|---------|---|-----------|
| 38 | Chaoyang | Gaoantun reclaimed water plant                                 | 20  | Non-MBR | Y | -         |
| 39 | Chaoyang | Gaobeidian reclaimed water plant                               | 100 | Non-MBR | Y | 151562322 |
| 40 | Fengtai  | Huaifang reclaimed water plant                                 | 60  | MBR     | Y | -         |
| 41 | Chaoyang | Qinghe reclaimed water plant II                                | 50  | Non-MBR | Y | 35308118  |
| 42 | Fengtai  | Weijia wastewater treatment plant                              | 10  | Non-MBR | Y | -         |
| 43 | Haidian  | Daoxianghu reclaimed water plant                               | 8   | MBR     | Y | -         |
| 44 | Shunyi   | Niulanshan reclaimed water plant                               | 2   | MBR     | Y | -         |
| 45 | Miyun    | Miyun Xincheng reclaimed water plant                           | 6.5 | MBR     | Y | -         |
| 46 | Shunyi   | Beishichao reclaimed water plant                               | 0.3 | MBR     | Y | -         |
| 47 | Shunyi   | Beixiaoying reclaimed water plant                              | 1   | MBR     | Y | -         |
| 48 | Fangshan | Zhangfang wastewater treatment plant                           | 0.2 | -       | Y | -         |
| 49 | Fangshan | Doudian modern manufactory industry base reclaimed water plant | 0.6 | Non-MBR | Y | -         |
| 50 | Fangshan | Changgou wastewater treatment plant                            | 0.5 | Non-MBR | Y | -         |

|    |             |                                                            |       |         |   |          |
|----|-------------|------------------------------------------------------------|-------|---------|---|----------|
| 51 | Fangshan    | Changyang wastewater treatment plant                       | 2     | Non-MBR | Y | 1770946  |
| 52 | Tongzhou    | Mayingcun wastewater treatment plant                       | 0.2   | Non-MBR | N | -        |
| 53 | Tongzhou    | Yuelianghe wastewater treatment plant                      | 0.1   | -       | N | -        |
| 54 | Tongzhou    | Jinqiao wastewater treatment plant                         | 0.5   | Non-MBR | N | -        |
| 55 | Daxing      | Beijing Jinyuanjingkai wastewater treatment company (Ltd.) | 6     | Non-MBR | Y | 10450510 |
| 56 | Daxing      | Anding wastewater treatment plant                          | 0.154 | MBR     | Y | -        |
| 57 | Shijingshan | Wulituo wastewater treatment plant                         | 2     | MBR     | N | 1607763  |
| 58 | Shunyi      | Shunyi district wastewater treatment plant                 | 18    | Non-MBR | N | 24305600 |
| 59 | Chaoyang    | Fatou wastewater treatment plant                           | 2     | Non-MBR | N | -        |
| 60 | Fengtai     | Hexi reclaimed water plant                                 | 5     | MBR     | Y | -        |
| 61 | Shunyi      | Zhaoquanying reclaimed water plant                         | 1.3   | MBR     | N | -        |
| 62 | Fangshan    | Lianggong industry district wastewater treatment plant     | 0.1   | Non-MBR | Y | -        |
| 63 | Yanqing     | Badaling town wastewater treatment plant                   | 0.45  | MBR     | Y | -        |

|    |           |                                                     |      |         |   |         |
|----|-----------|-----------------------------------------------------|------|---------|---|---------|
| 64 | Yanqing   | Chengxi reclaimed water plant                       | 6    | MBR     | Y | -       |
| 65 | Yanqing   | Jiuxian town wastewater treatment plant             | 0.15 | Non-MBR | Y | -       |
| 66 | Yanqing   | Yongning town wastewater treatment plant            | 0.36 | Non-MBR | Y | -       |
| 67 | Huairou   | Qiaoxin wastewater treatment plant                  | 0.24 | Non-MBR | N | -       |
| 68 | Daxing    | Qingyundian town Fashang wastewater treatment plant | 0.1  | Non-MBR | Y | -       |
| 69 | Chaoyang  | Beiyuan wastewater treatment plant                  | 4    | Non-MBR | Y | 4336600 |
| 70 | Mentougou | Datai office wastewater treatment plant             | 0.15 | Non-MBR | Y | 5760120 |
| 71 | Mentougou | Junzhuang town wastewater treatment plant           | 0.6  | Non-MBR | Y | -       |
| 72 | Mentougou | Miaofengshan town wastewater treatment plant        | 0.06 | Non-MBR | Y | -       |
| 73 | Mentougou | Tanzhesi town wastewater treatment plant            | 0.5  | Non-MBR | Y | -       |
| 74 | Mentougou | Wangping town Jiuyuan wastewater treatment plant    | 0.05 | Non-MBR | Y | -       |
| 75 | Mentougou | Zhaitang town wastewater treatment plant            | 0.15 | MBR     | Y | -       |
| 76 | Mentougou | Qingshui town wastewater treatment plant            | 0.2  | -       | Y | -       |

|    |           |                                                  |      |         |   |          |
|----|-----------|--------------------------------------------------|------|---------|---|----------|
| 77 | Pinggu    | Donggaocun town wastewater treatment plant       | 0.4  | Non-MBR | Y | -        |
| 78 | Pinggu    | Liujadian town wastewater treatment plant        | 0.08 | MBR     | Y | -        |
| 79 | Pinggu    | Machangying town wastewater treatment plant      | 0.6  | Non-MBR | Y | -        |
| 80 | Pinggu    | Mafangzhen town wastewater treatment plant       | 1.1  | Non-MBR | Y | -        |
| 81 | Pinggu    | Yukou town Huxinhuang wastewater treatment plant | 0.15 | MBR     | Y | -        |
| 82 | Pinggu    | Yukou town Zhongqiao wastewater treatment plant  | 0.1  | Non-MBR | Y | -        |
| 83 | Pinggu    | Ruhe wastewater treatment plant                  | 8    | MBR     | Y | 15367380 |
| 84 | Tongzhou  | Huoxian town wastewater treatment plant          | 1    | Non-MBR | N | 892912   |
| 85 | Changping | Nankou town central wastewater treatment plant   | 2    | Non-MBR | Y | 1836617  |
| 86 | Changping | Nankou town west wastewater treatment plant      | 0.5  | Non-MBR | Y | -        |
| 87 | Changping | Feature technology city reclaimed water plant    | 8    | Non-MBR | Y | -        |
| 88 | Changping | Changping wastewater treatment center            | 5.4  | Non-MBR | Y | 6129350  |
| 89 | Fengtai   | Huaxiang south wastewater treatment plant        | 0.81 | Non-MBR | Y | -        |

|     |          |                                                                                  |      |         |   |   |
|-----|----------|----------------------------------------------------------------------------------|------|---------|---|---|
| 90  | Fengtai  | Xiaoyueyuan wastewater treatment plant                                           | 0.5  | Non-MBR | Y | - |
| 91  | Tongzhou | Nanxiaoyingcun wastewater treatment plant                                        | 0.15 | Non-MBR | Y | - |
| 92  | Tongzhou | Guantoucun south wastewater treatment plant                                      | 0.2  | Non-MBR | Y | - |
| 93  | Tongzhou | Guantoucun west wastewater treatment plant                                       | 0.15 | Non-MBR | Y | - |
| 94  | Tongzhou | Shuangfutoucun wastewater treatment plant                                        | 0.07 | MBR     | Y | - |
| 95  | Tongzhou | Wugezhuang wastewater treatment plant                                            | 0.05 | MBR     | Y | - |
| 96  | Tongzhou | Xindiancun wastewater treatment plant                                            | 0.2  | MBR     | Y | - |
| 97  | Daxing   | Beijing textiles and clothing industry base emergency wastewater treatment plant | 0.08 | Non-MBR | Y | - |
| 98  | Fangshan | Yancun town wastewater treatment plant                                           | 0.3  | Non-MBR | Y | - |
| 99  | Chaoyang | Dongba wastewater treatment plant                                                | 2    | Non-MBR | Y | - |
| 100 | Shunyi   | Capital airport west wastewater treatment plant                                  | 2    | Non-MBR | Y | - |
| 101 | Daxing   | Beijing Capital airport power and energy company (Ltd.)                          | 2    | MBR     | Y | - |
| 102 | Shunyi   | Capital airport east wastewater treatment plant                                  | 8    | Non-MBR | Y | - |

|     |          |                                                       |      |         |   |          |
|-----|----------|-------------------------------------------------------|------|---------|---|----------|
| 103 | Shunyi   | Nancaicaifeng community wastewater treatment plant    | 0.3  | Non-MBR | Y | -        |
| 104 | Shunyi   | Hanshiqiao wetland wastewater treatment plant         | 0.65 | MBR     | Y | -        |
| 105 | Shunyi   | Mapo reclaimed water plant                            | 4    | MBR     | Y | -        |
| 106 | Shunyi   | Wenyuhe water resources utilization project           | 2    | MBR     | Y | 15756400 |
| 107 | Shunyi   | Yangzhen reclaimed water plant                        | 0.3  | Non-MBR | Y | -        |
| 108 | Shunyi   | Tianzhu wastewater treatment plant                    | 2    | Non-MBR | N | 2468052  |
| 109 | Miyun    | Beijing Wanjia water company (Ltd.)                   | 0.3  | Non-MBR | N | -        |
| 110 | Haidian  | Beijing Xiaojiahe wastewater treatment company (Ltd.) | 8    | Non-MBR | N | 14717262 |
| 111 | Tongzhou | Hedong reclaimed water plant                          | 4    | MBR     | N | 6687990  |
| 112 | Tongzhou | Taihu wastewater treatment plant                      | 1    | Non-MBR | N | -        |
| 113 | Tongzhou | Beijing Bishui reclaimed water plant                  | 18   | Non-MBR | N | 23902740 |
| 114 | Daxing   | Yufa wastewater treatment plant                       | 0.7  | Non-MBR | N | -        |
| 115 | Daxing   | Xinhangcheng east district reclaimed water plant      | 3    | Non-MBR | Y | -        |

|     |          |                                                        |     |         |   |          |
|-----|----------|--------------------------------------------------------|-----|---------|---|----------|
| 116 | Daxing   | Xinhangcheng west district reclaimed water plant       | 5   | Non-MBR | Y | -        |
| 117 | Daxing   | Huangcun reclaimed water plant                         | 12  | MBR     | Y | 31321040 |
| 118 | Daxing   | Daxinzhuang wastewater treatment plant                 | 0.2 | -       | Y | -        |
| 119 | Daxing   | Liuminying wastewater treatment plant                  | 0.1 | -       | Y | -        |
| 120 | Daxing   | Zhaojiayuan wastewater treatment plant                 | 0.1 | -       | Y | -        |
| 121 | Daxing   | Xihongmen reclaimed water plant                        | 4   | Non-MBR | Y | -        |
| 122 | Fangshan | Beijing Yancun Longrenshiji wastewater treatment plant | 0.1 | Non-MBR | Y | -        |
| 123 | Fangshan | Niukouyu wastewater treatment plant                    | 8.4 | Non-MBR | N | -        |
| 124 | Fangshan | Xingcheng wastewater treatment plant                   | 0.6 | Non-MBR | N | -        |
| 125 | Daxing   | Yizhuang east district wastewater treatment plant      | 5   | MBR     | Y | 4713910  |
| 126 | Daxing   | Yizhuang south district wastewater treatment plant     | 2   | MBR     | Y | -        |
| 127 | Tongzhou | Zhangjiawan reclaimed water plant                      | 4   | Non-MBR | N | -        |
| 128 | Daxing   | Panggezhuang wastewater treatment plant                | 1.1 | Non-MBR | Y | -        |

|     |          |                                                                 |       |         |   |         |
|-----|----------|-----------------------------------------------------------------|-------|---------|---|---------|
| 129 | Fangshan | Liangxiang wastewater treatment plant                           | 8     | Non-MBR | N | 3452124 |
| 130 | Fengtai  | Qinglonghu reclaimed water plant                                | 1     | Non-MBR | Y | -       |
| 131 | Haidian  | Shangzhuang water recycle metabolism demonstration project      | 0.5   | MBR     | N | -       |
| 132 | Daxing   | EverBright Water (Beijing) company (Ltd.)                       | 8     | Non-MBR | N | 8741888 |
| 133 | Haidian  | Baishuiwacun wastewater treatment plant                         | 0.06  | Non-MBR | - | -       |
| 134 | Haidian  | Meisuotuncun wastewater treatment plant                         | 0.075 | Non-MBR | - | -       |
| 135 | Haidian  | Shangzhuang community north district wastewater treatment plant | 0.15  | Non-MBR | - | -       |
| 136 | Haidian  | Shangzhuang community south district wastewater treatment plant | 0.25  | Non-MBR | - | -       |
| 137 | Haidian  | Shangzhuang 134 wastewater treatment plant                      | 0.08  | Non-MBR | - | -       |
| 138 | Haidian  | Shuangtacun wastewater treatment plant                          | 0.06  | MBR     | - | -       |
| 139 | Haidian  | Xiyuhecun wastewater treatment plant                            | 0.05  | Non-MBR | - | -       |
| 140 | Haidian  | Zaojiatuncun wastewater treatment plant                         | 0.085 | Non-MBR | - | -       |
| 141 | Haidian  | Beianhecun wastewater treatment plant                           | 0.09  | MBR     | - | -       |

|     |           |                                                             |       |         |   |   |
|-----|-----------|-------------------------------------------------------------|-------|---------|---|---|
| 142 | Haidian   | Caochangcun wastewater treatment plant                      | 0.05  | Non-MBR | - | - |
| 143 | Haidian   | Cheeryingcun wastewater treatment plant                     | 0.1   | Non-MBR | - | - |
| 144 | Haidian   | Liulincun wastewater treatment plant                        | 0.055 | MBR     | - | - |
| 145 | Haidian   | Niegezhuangcun wastewater treatment plant                   | 0.31  | MBR     | - | - |
| 146 | Haidian   | Xifutoucun wastewater treatment plant                       | 0.1   | MBR     | - | - |
| 147 | Haidian   | Zhoujiaxiangcun wastewater treatment plant                  | 0.06  | MBR     | - | - |
| 148 | Haidian   | Hanjiachuang wastewater treatment plant                     | 0.05  | MBR     | - | - |
| 149 | Tongzhou  | Hujiafacun wastewater treatment plant                       | 0.07  | Non-MBR | Y | - |
| 150 | Daxing    | Lvyinbieshu wastewater treatment plant                      | 0.13  | MBR     | Y | - |
| 151 | Daxing    | Qingyundian wastewater treatment plant                      | 0.12  | MBR     | N | - |
| 152 | Fangshan  | China institute of atomic energy wastewater treatment plant | 0.192 | Non-MBR | Y | - |
| 153 | Changping | Baishan town reclaimed water plant                          | 2     | Non-MBR | Y | - |
| 154 | Changping | Machikou town reclaimed water plant                         | 2.5   | Non-MBR | Y | - |

|     |           |                                                     |      |         |   |        |
|-----|-----------|-----------------------------------------------------|------|---------|---|--------|
| 155 | Changping | Yangfang town north district reclaimed water plant  | 0.63 | Non-MBR | Y | -      |
| 156 | Changping | Liucun town reclaimed water plant                   | 0.2  | Non-MBR | Y | -      |
| 157 | Changping | xiaotangshan town reclaimed water plant             | 7    | Non-MBR | Y | 862756 |
| 158 | Tongzhou  | Huoxian town Mizidian reclaimed water plant         | 0.1  | Non-MBR | Y | -      |
| 159 | Tongzhou  | Lucheng Gantang reclaimed water plant               | 1    | Non-MBR | Y | -      |
| 160 | Tongzhou  | Maquqiao town reclaimed water plant                 | 2    | Non-MBR | Y | -      |
| 161 | Tongzhou  | Songzhuang town Zhaixinzhuang reclaimed water plant | 0.4  | Non-MBR | Y | -      |
| 162 | Tongzhou  | Taihu reclaimed water plant II                      | 1    | Non-MBR | Y | -      |
| 163 | Tongzhou  | Xiji town central reclaimed water plant II          | 0.3  | Non-MBR | Y | -      |
| 164 | Tongzhou  | Xiji town central reclaimed water plant I           | 0.2  | Non-MBR | Y | -      |
| 165 | Tongzhou  | Yongledian town reclaimed water plant II            | 0.1  | Non-MBR | Y | -      |
| 166 | Tongzhou  | Yongledian town reclaimed water plant I             | 1    | Non-MBR | Y | -      |
| 167 | Tongzhou  | Yujiawu central reclaimed water plant II            | 0.5  | Non-MBR | Y | -      |

|     |           |                                                               |      |         |   |   |
|-----|-----------|---------------------------------------------------------------|------|---------|---|---|
| 168 | Tongzhou  | Yujiawu central reclaimed water plant I                       | 1    | MBR     | - | - |
| 169 | Tongzhou  | Zhangjiawan town Niubaotun wastewater treatment plant         | 0.3  | Non-MBR | Y | - |
| 170 | Tongzhou  | Zhangjiawan town west Dingfuzhuang wastewater treatment plant | 0.2  | Non-MBR | Y | - |
| 171 | Tongzhou  | Shuangfutoucun Nankeng wastewater treatment plant             | 0.06 | Non-MBR | N | - |
| 172 | Daxing    | Weishanzhuang town reclaimed water plant                      | 1.2  | Non-MBR | Y | - |
| 173 | Daxing    | Huangcun town reclaimed water plant                           | 2    | Non-MBR | Y | - |
| 174 | Mentougou | Datai community wastewater treatment plant                    | 0.15 | Non-MBR | Y | - |
| 175 | Daxing    | Beijing Caiyu wastewater treatment plant                      | 1.5  | Non-MBR | N | - |

Ltd.: limited; MBR: membrane bioreactor; - : no data.

Data sources: <https://www.mee.gov.cn/xxgk/xxgk01/202011/W020221214700986955780.pdf>; <http://xxgk.bevoice.com.cn/monitor-pub/index.do>

**Table S2: Representative policies related to wastewater governance at the national and municipal levels**

| Category                                                                                                                         |                                             | Name & Number                                                                                                                                                                                                                                                | Year Issued                                                        |
|----------------------------------------------------------------------------------------------------------------------------------|---------------------------------------------|--------------------------------------------------------------------------------------------------------------------------------------------------------------------------------------------------------------------------------------------------------------|--------------------------------------------------------------------|
| National                                                                                                                         | CPC Central Committee and the State Council | <i>Opinions of the Central Committee of the CPC and the State Council on Accelerating the Promotion of Ecological Progress</i><br>[State Council Gazette, Issue No. 14, Serial No. 1517 (May 20, 2015)]                                                      | 2015                                                               |
|                                                                                                                                  |                                             | <i>Circular of the State Council on Printing and Issuing the Action Plan for the Prevention and Control of Water Pollution</i><br>[State Council Gazette, Issue No. 12, Serial No. 1515 (April 30, 2015)]                                                    | 2015                                                               |
|                                                                                                                                  |                                             | <i>Opinions of the Central Committee of the CPC and the State Council on Comprehensively Enhancing Eco-Environmental Protection to Completely Win the Battle Against Pollution</i><br>[State Council Gazette, Issue No. 19, Serial No. 1630 (July 10, 2018)] | 2018                                                               |
|                                                                                                                                  |                                             | <i>Opinions of the Central Committee of the CPC and the State Council on Further Fighting the Tough Battle of Pollution Prevention and Control</i><br>[State Council Gazette, Issue No. 32, Serial No. 1751 (Nov 20, 2021)]                                  | 2021                                                               |
|                                                                                                                                  | The Ministries                              | <i>Guiding Opinions on Pushing Forward the Transformation of Wastewater into Resources for Use</i><br>[Department of Resource Conservation and Environmental Protection, National Development and Reform Commission, 2021, No.13]                            | 2021                                                               |
|                                                                                                                                  |                                             | <i>Implementation Plan for Conducting Experiments in Regional Reclaimed Water Circular Use</i><br>[General Office, Ministry of Ecological and Environment, 2021, No. 28]                                                                                     | 2021                                                               |
|                                                                                                                                  | Municipal                                   | Plans                                                                                                                                                                                                                                                        | <i>Comprehensive City Plan of Beijing Municipality (2016-2035)</i> |
| <i>Outline of the Fourteenth Five-year Plan for National Economic and Social Development of Beijing Municipality (2021-2025)</i> |                                             |                                                                                                                                                                                                                                                              | 2021                                                               |
| Action plans                                                                                                                     |                                             | <i>Three-year action plan for further promoting urban-rural aquatic environment governance work (2019-2022)</i>                                                                                                                                              | 2019                                                               |
|                                                                                                                                  |                                             | <i>Three-year action plan for further promoting wastewater treatment and reclaimed water reuse works (2016-2019)</i>                                                                                                                                         | 2016                                                               |
|                                                                                                                                  |                                             | <i>Three-year action plan for promoting the construction of wastewater treatment and reclaimed water reuse (2013-2015)</i>                                                                                                                                   | 2013                                                               |

Data source: <http://english.www.gov.cn/archive/statecouncilgazette>

**Table S3: Local standards of wastewater treatment and reuse in Beijing**

| Category                      | Name                                                                                                                              | Number             |
|-------------------------------|-----------------------------------------------------------------------------------------------------------------------------------|--------------------|
| Collection & Treatment        | Specification for Domestic Sewage Collection and Treatment in Villages                                                            | DB11/T 1495—2017   |
|                               | The stipulation of energy consumption of municipal wastewater treatment                                                           | DB11/T 118—2014    |
|                               | Technical specification constructed wetlands for rural sewage treatment engineering                                               | DB11/T 376—2016    |
|                               | Technical guidelines for odor control project of municipal reclaimed water plant                                                  | DB11/T 1755—2020   |
| Wastewater Discharge          | Discharge standard of water pollutants for municipal wastewater treatment plants                                                  | DB11/890—2012      |
|                               | Discharge standard of water pollutants for rural sewage treatment facilities                                                      | DB11/ 1612—2019    |
| Wastewater Reuse              | Code for design of sewage-source heat pump system                                                                                 | DB11/T 237—2015    |
|                               | Guidelines for the use of urban reclaimed water —Part 4: Scenic environment uses                                                  | DB11/T 1767.4—2021 |
|                               | Guidelines for the use of urban reclaimed water —Part 1: Industrial uses                                                          | DB11/T 1767—2020   |
|                               | Technical guideline for agricultural irrigation with reclaimed water                                                              | DB11/T 740—2010    |
|                               | Technical specifications for green space irrigation with reclaimed water                                                          | DB11/T 672—2009    |
|                               | Technical code for reclaimed water heat pump system                                                                               | DB11/T 1254—2015   |
| WWTP Construction & Operation | Technical specification for grade assessment of work safety Part 65: Municipal wastewater treatment plant (reclaimed water plant) | DB11/T 322.65—2019 |
|                               | Monitoring and testing for energy saving of sewage-source heat pump heating system                                                | DB11/T 1651—2019   |
|                               | Guidelines for real-time monitoring of water flow and water quality for domestic sewage treatment facilities in rural areas       | DB11/T 1852—2021   |
|                               | Code for operation and safety management of underground water reclamation plant                                                   | DB11/T 1818—2021   |
|                               | Assessment indicator system of ecological water reclamation plant                                                                 | DB11/T 1658—2019   |

Data source: <http://scjgj.beijing.gov.cn/cxfw/>

**Figure S1: Governance structure of wastewater treatment and reuse at the district level**

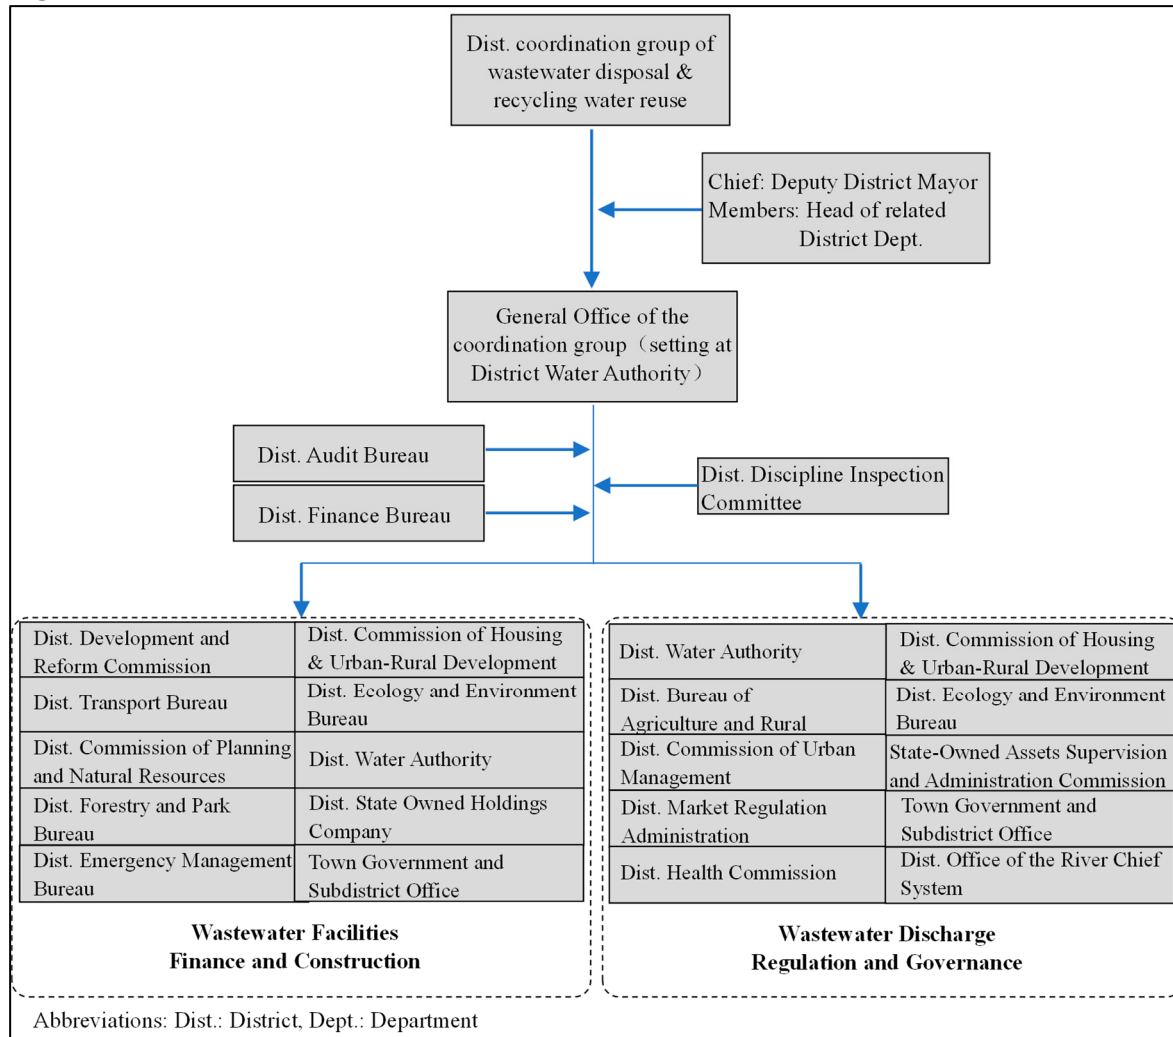

Data sources: *Three-year action plan of Pinggu district for promoting the construction of wastewater treatment and reclaimed water reuse (2013-2015)*; *Three-year action plan of Daxing district for further promoting wastewater treatment and reclaimed water reuse works (2016-2019)*; *Three-year action plan of Changping district for further promoting urban-rural aquatic environment governance work (2019-2022)*.
